# Supplementary material for: Using Gypsum-modified Biochar to Adsorb Phosphate from Water: Adsorption Performance and Mechanism
Source: Research Square preprint supplement (doi:10.21203/rs.3.rs-5660141/v1), 2024-12-20
Supplement: Supplementary file 1 [file c79f531cad5d7dc9bc94c11e.docx]

# Using Gypsum-modified Biochar to Adsorb Phosphate from Water: Adsorption Performance and Mechanism

Guanli Xu, Di Wu*, Xiang Ao

College of Earth and Planetary Science Sciences, Chengdu University of Technology, Chengdu, 610059, P.R. China.

*Corresponding author. E-mail address: [asumio1994@gmail.com](mailto:asumio1994@gmail.com).

**
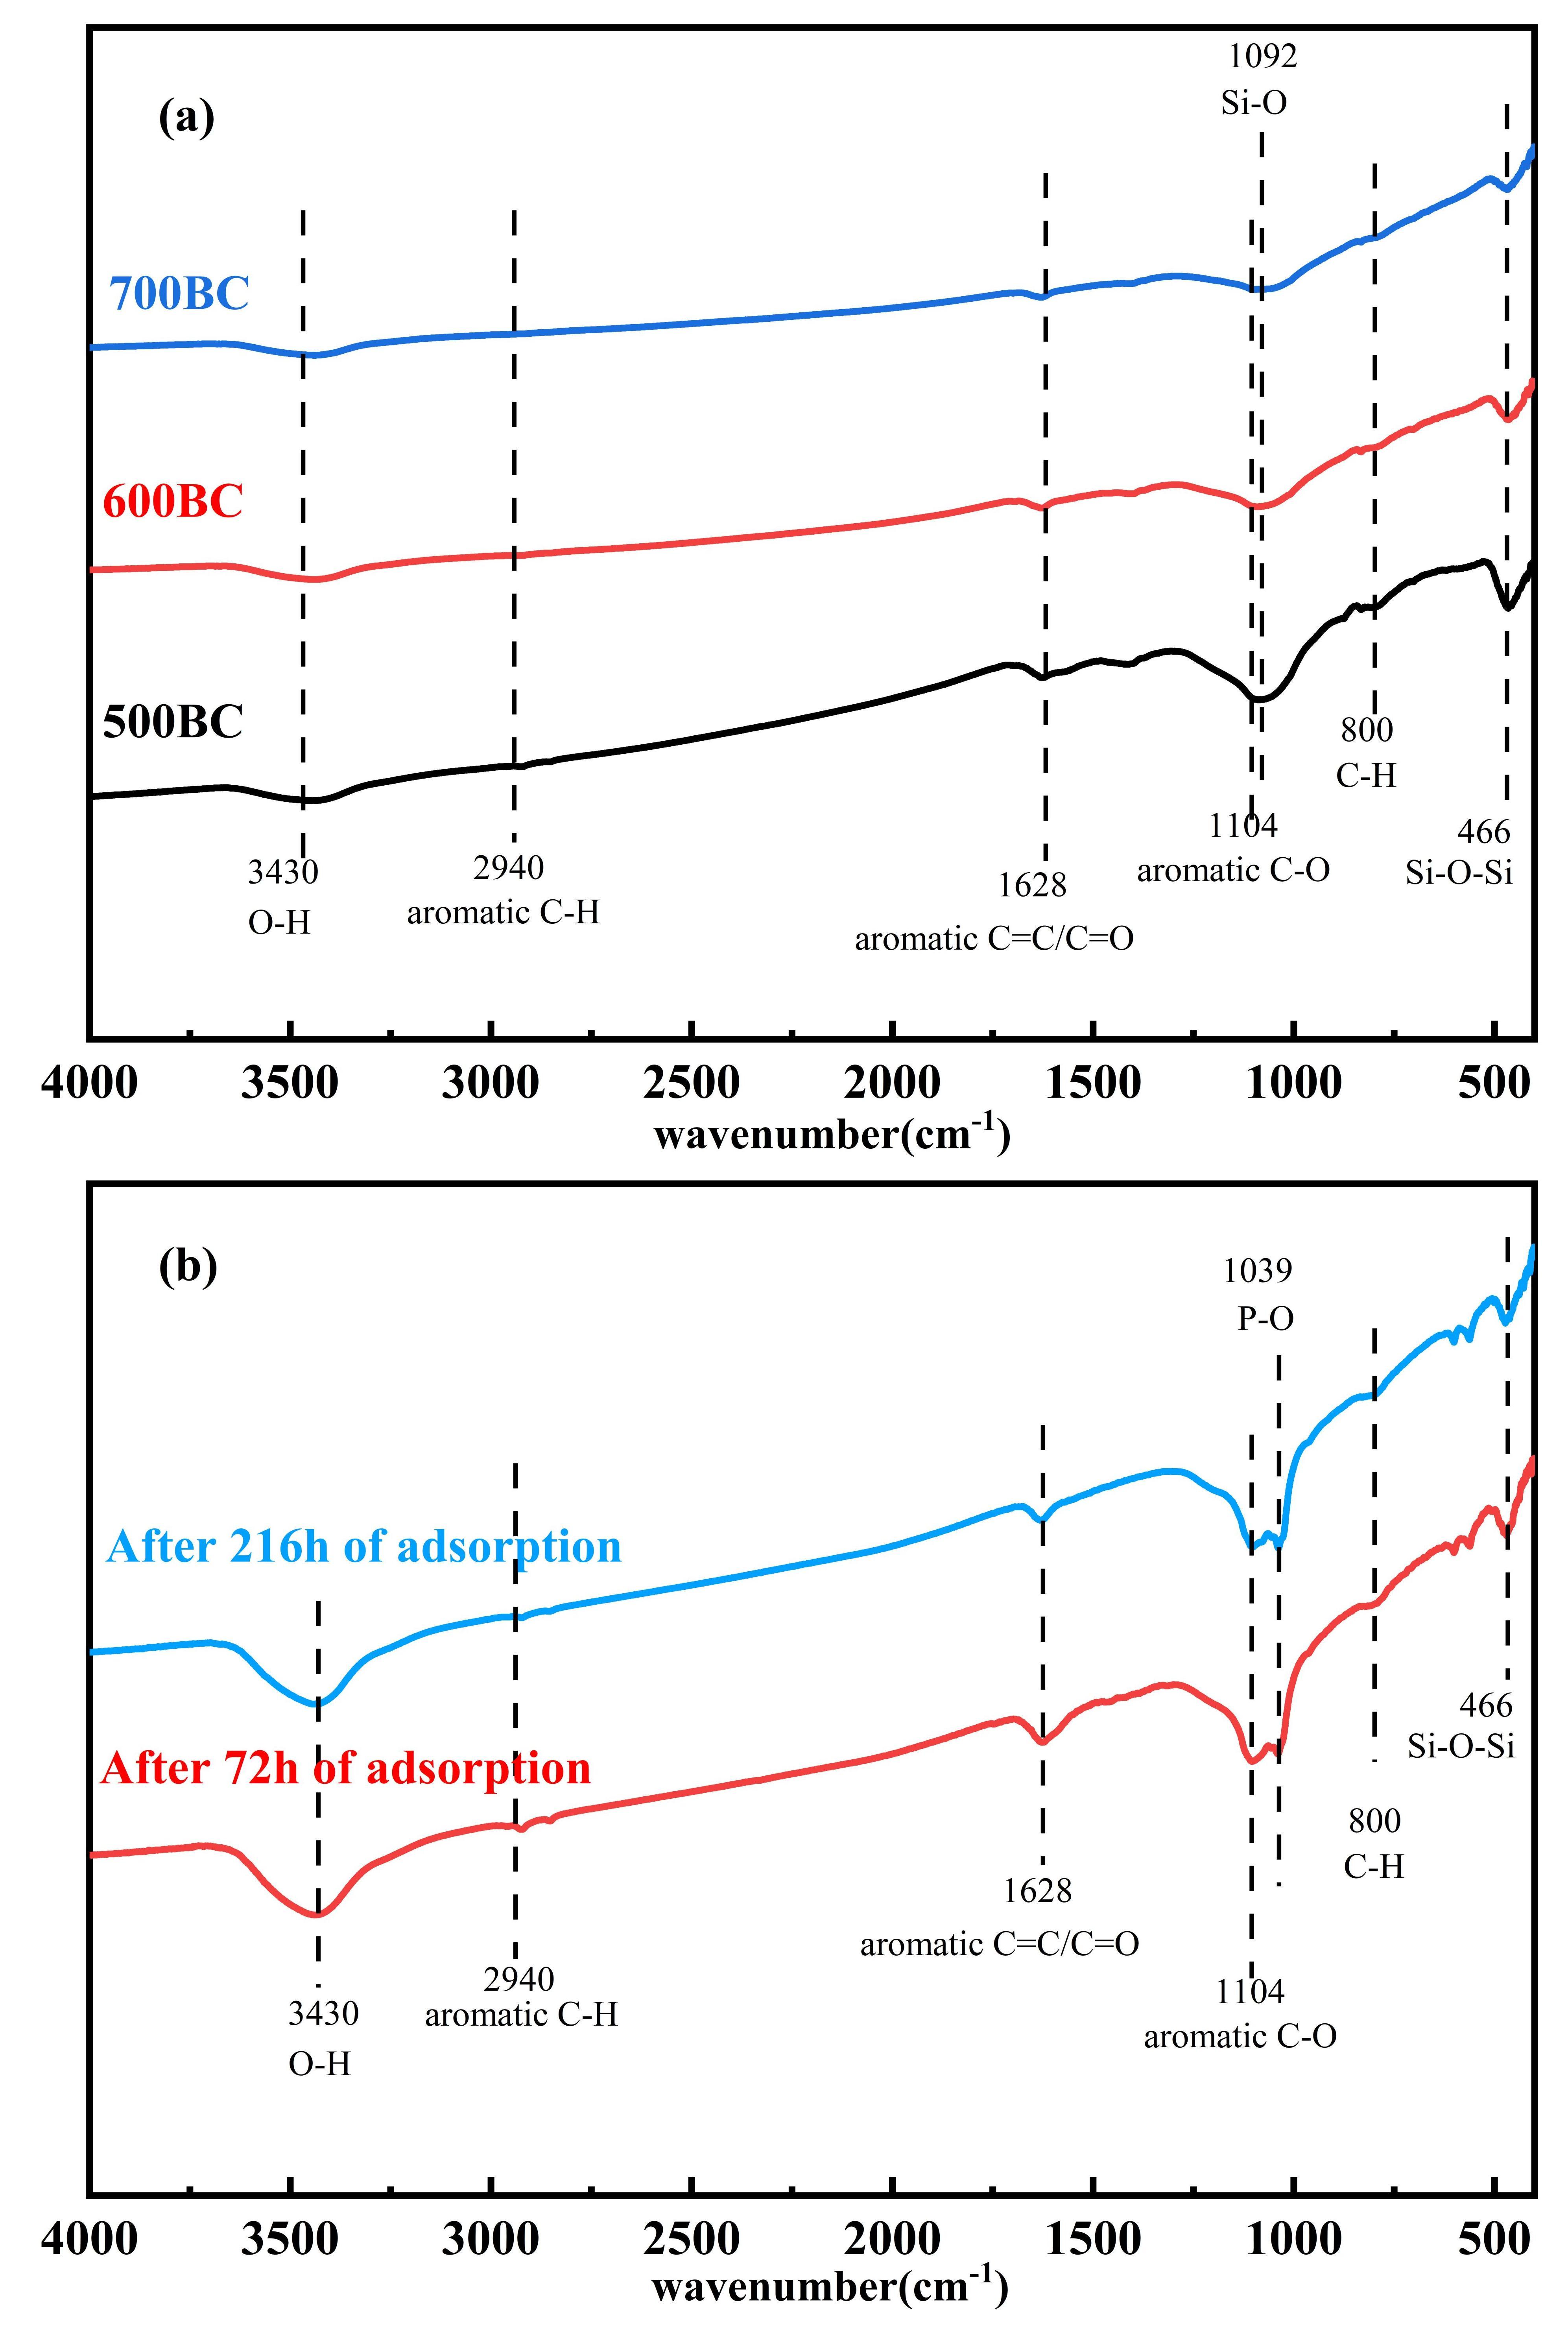
**

**Fig. S1.** FTIR Spectra of (a) 700BC, 600BC and 500BC and (b) 700GBC after adsorption for 72 and 216 h.


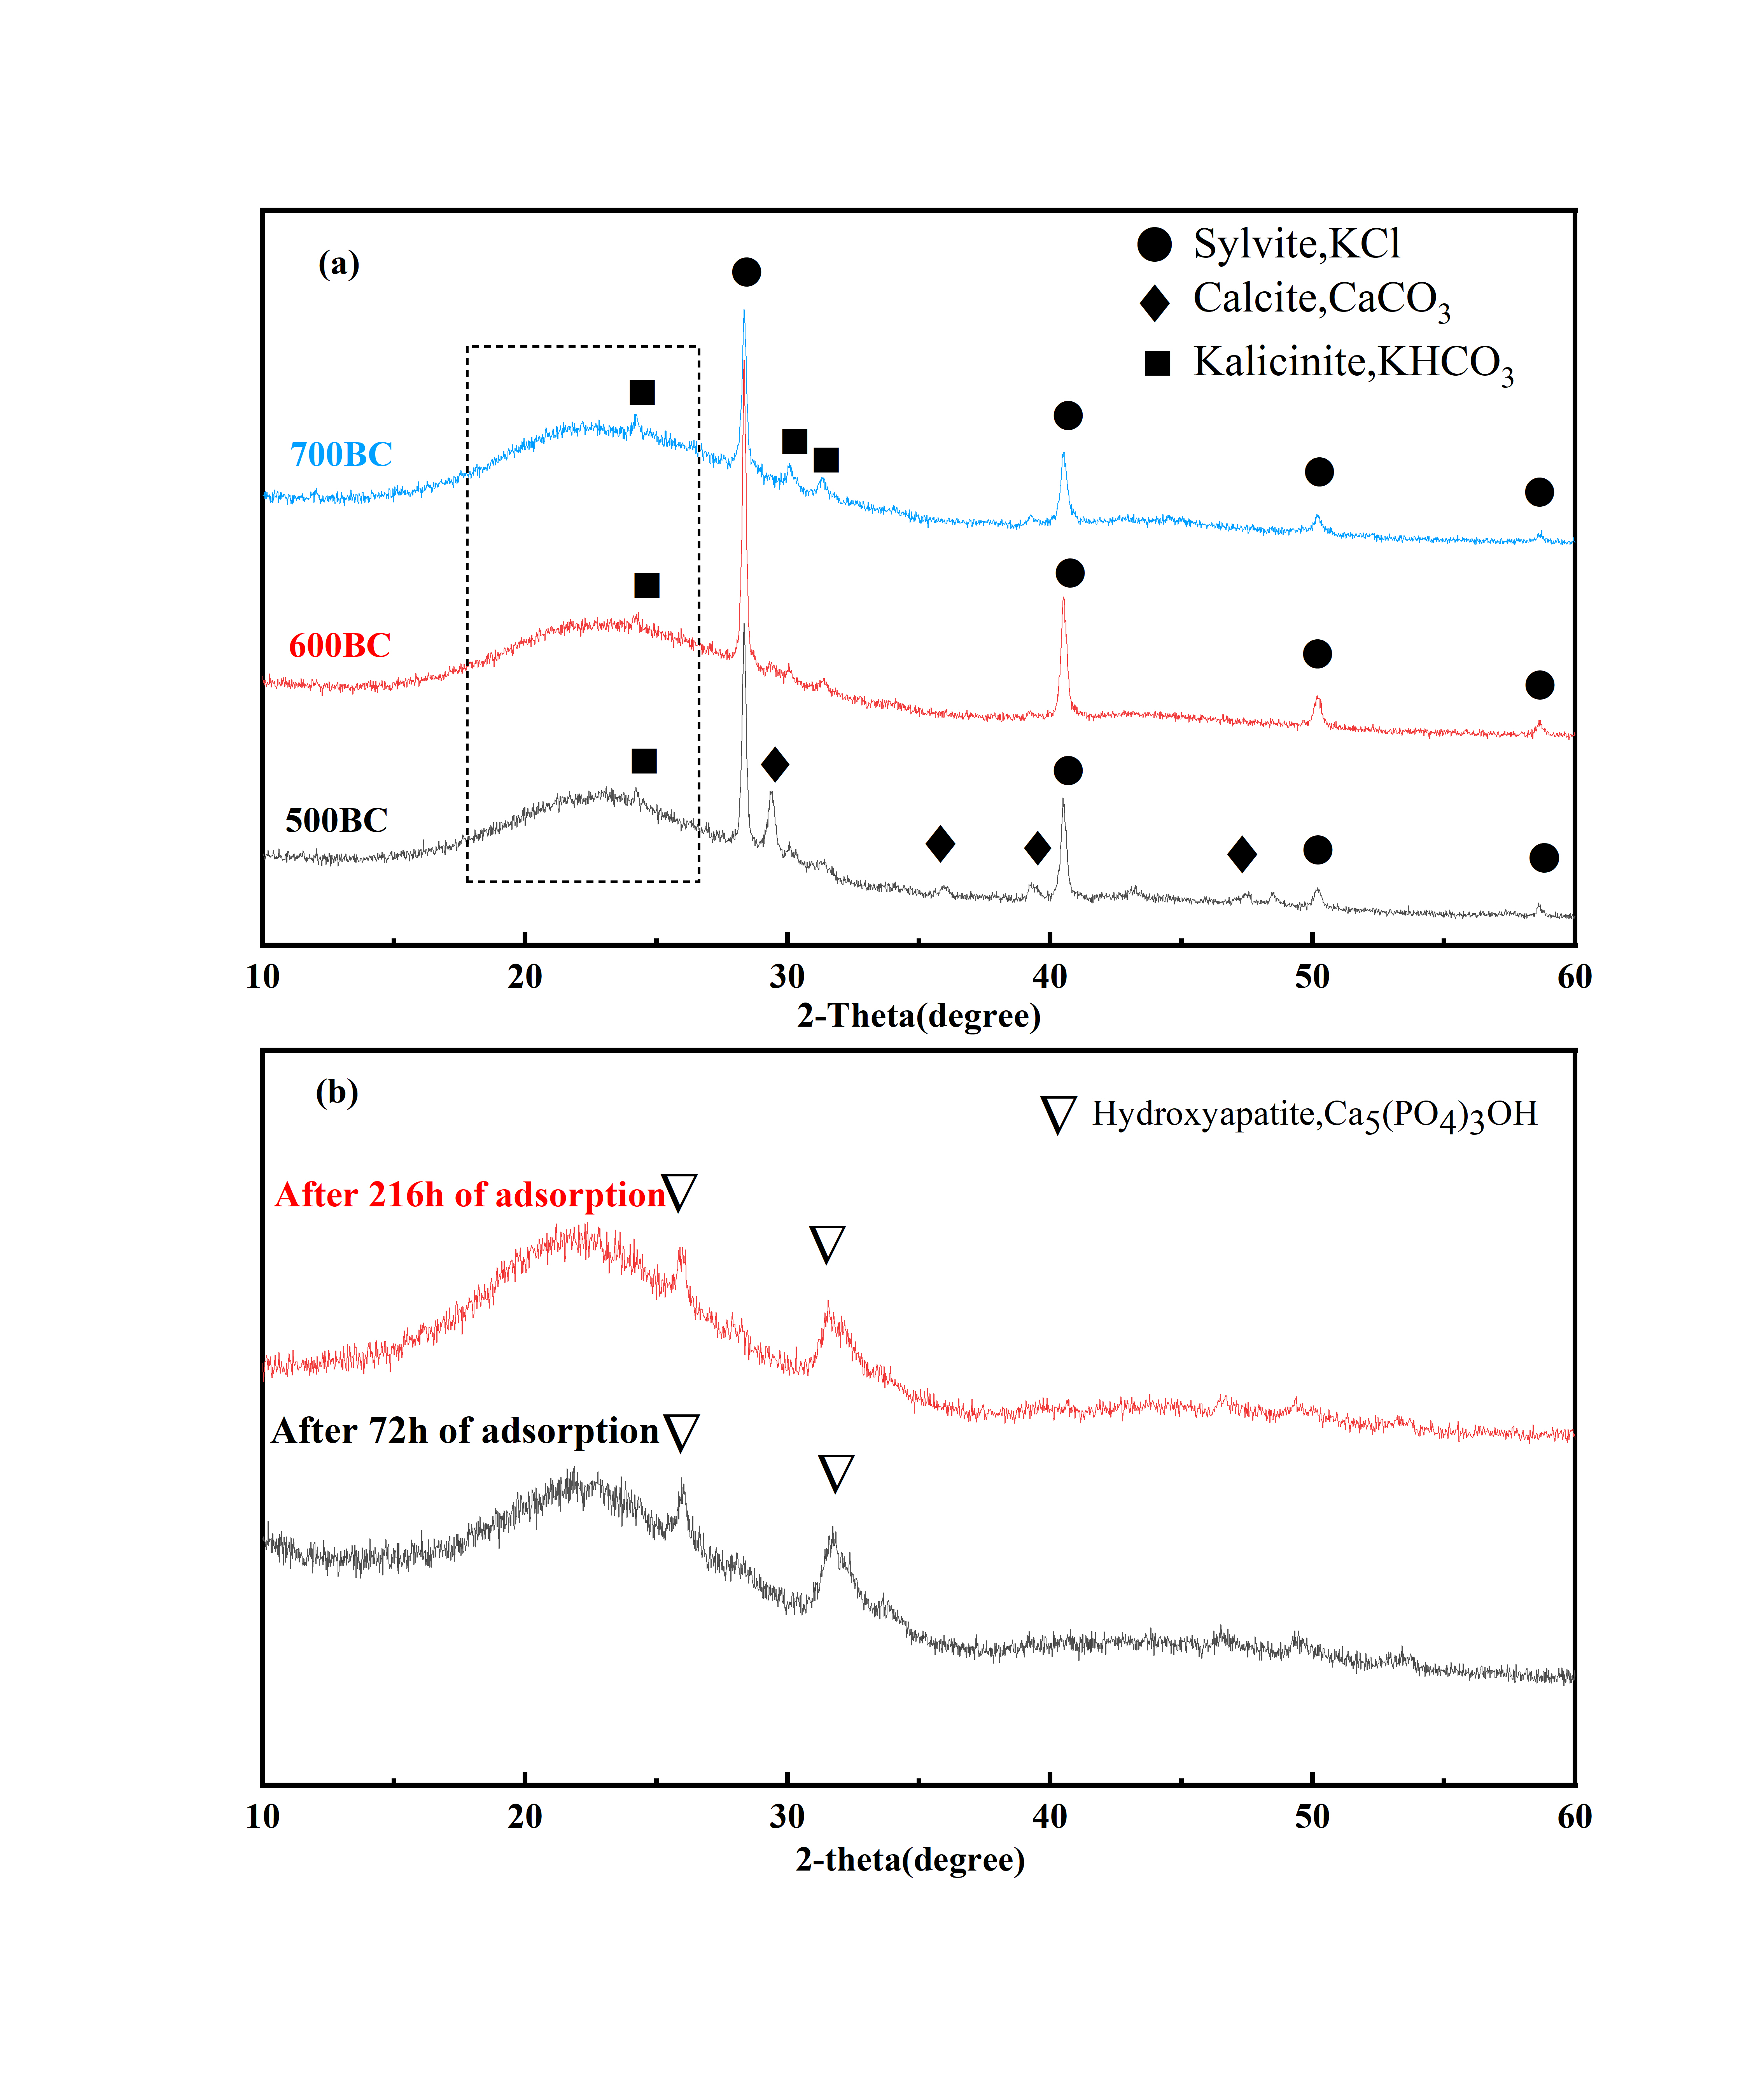


**Fig. S2.** XRD spectra of (a) 700BC, 600BC and 500BC and (b) 700GBC after adsorption for 216 and 72 h


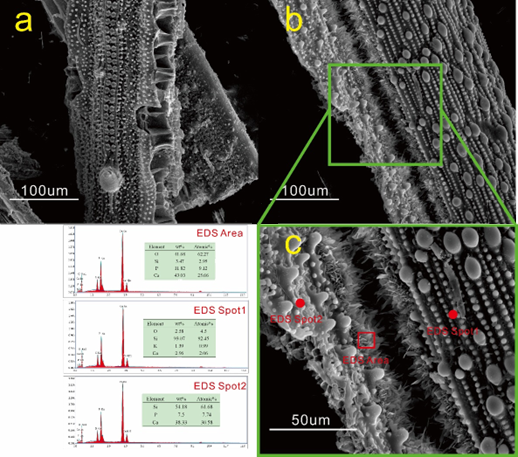


**Fig. S3.** SEM images of 700BC before adsorption and (b) 700GBC after adsorption. (c) SEM and EDS images of GBC after adsorption.


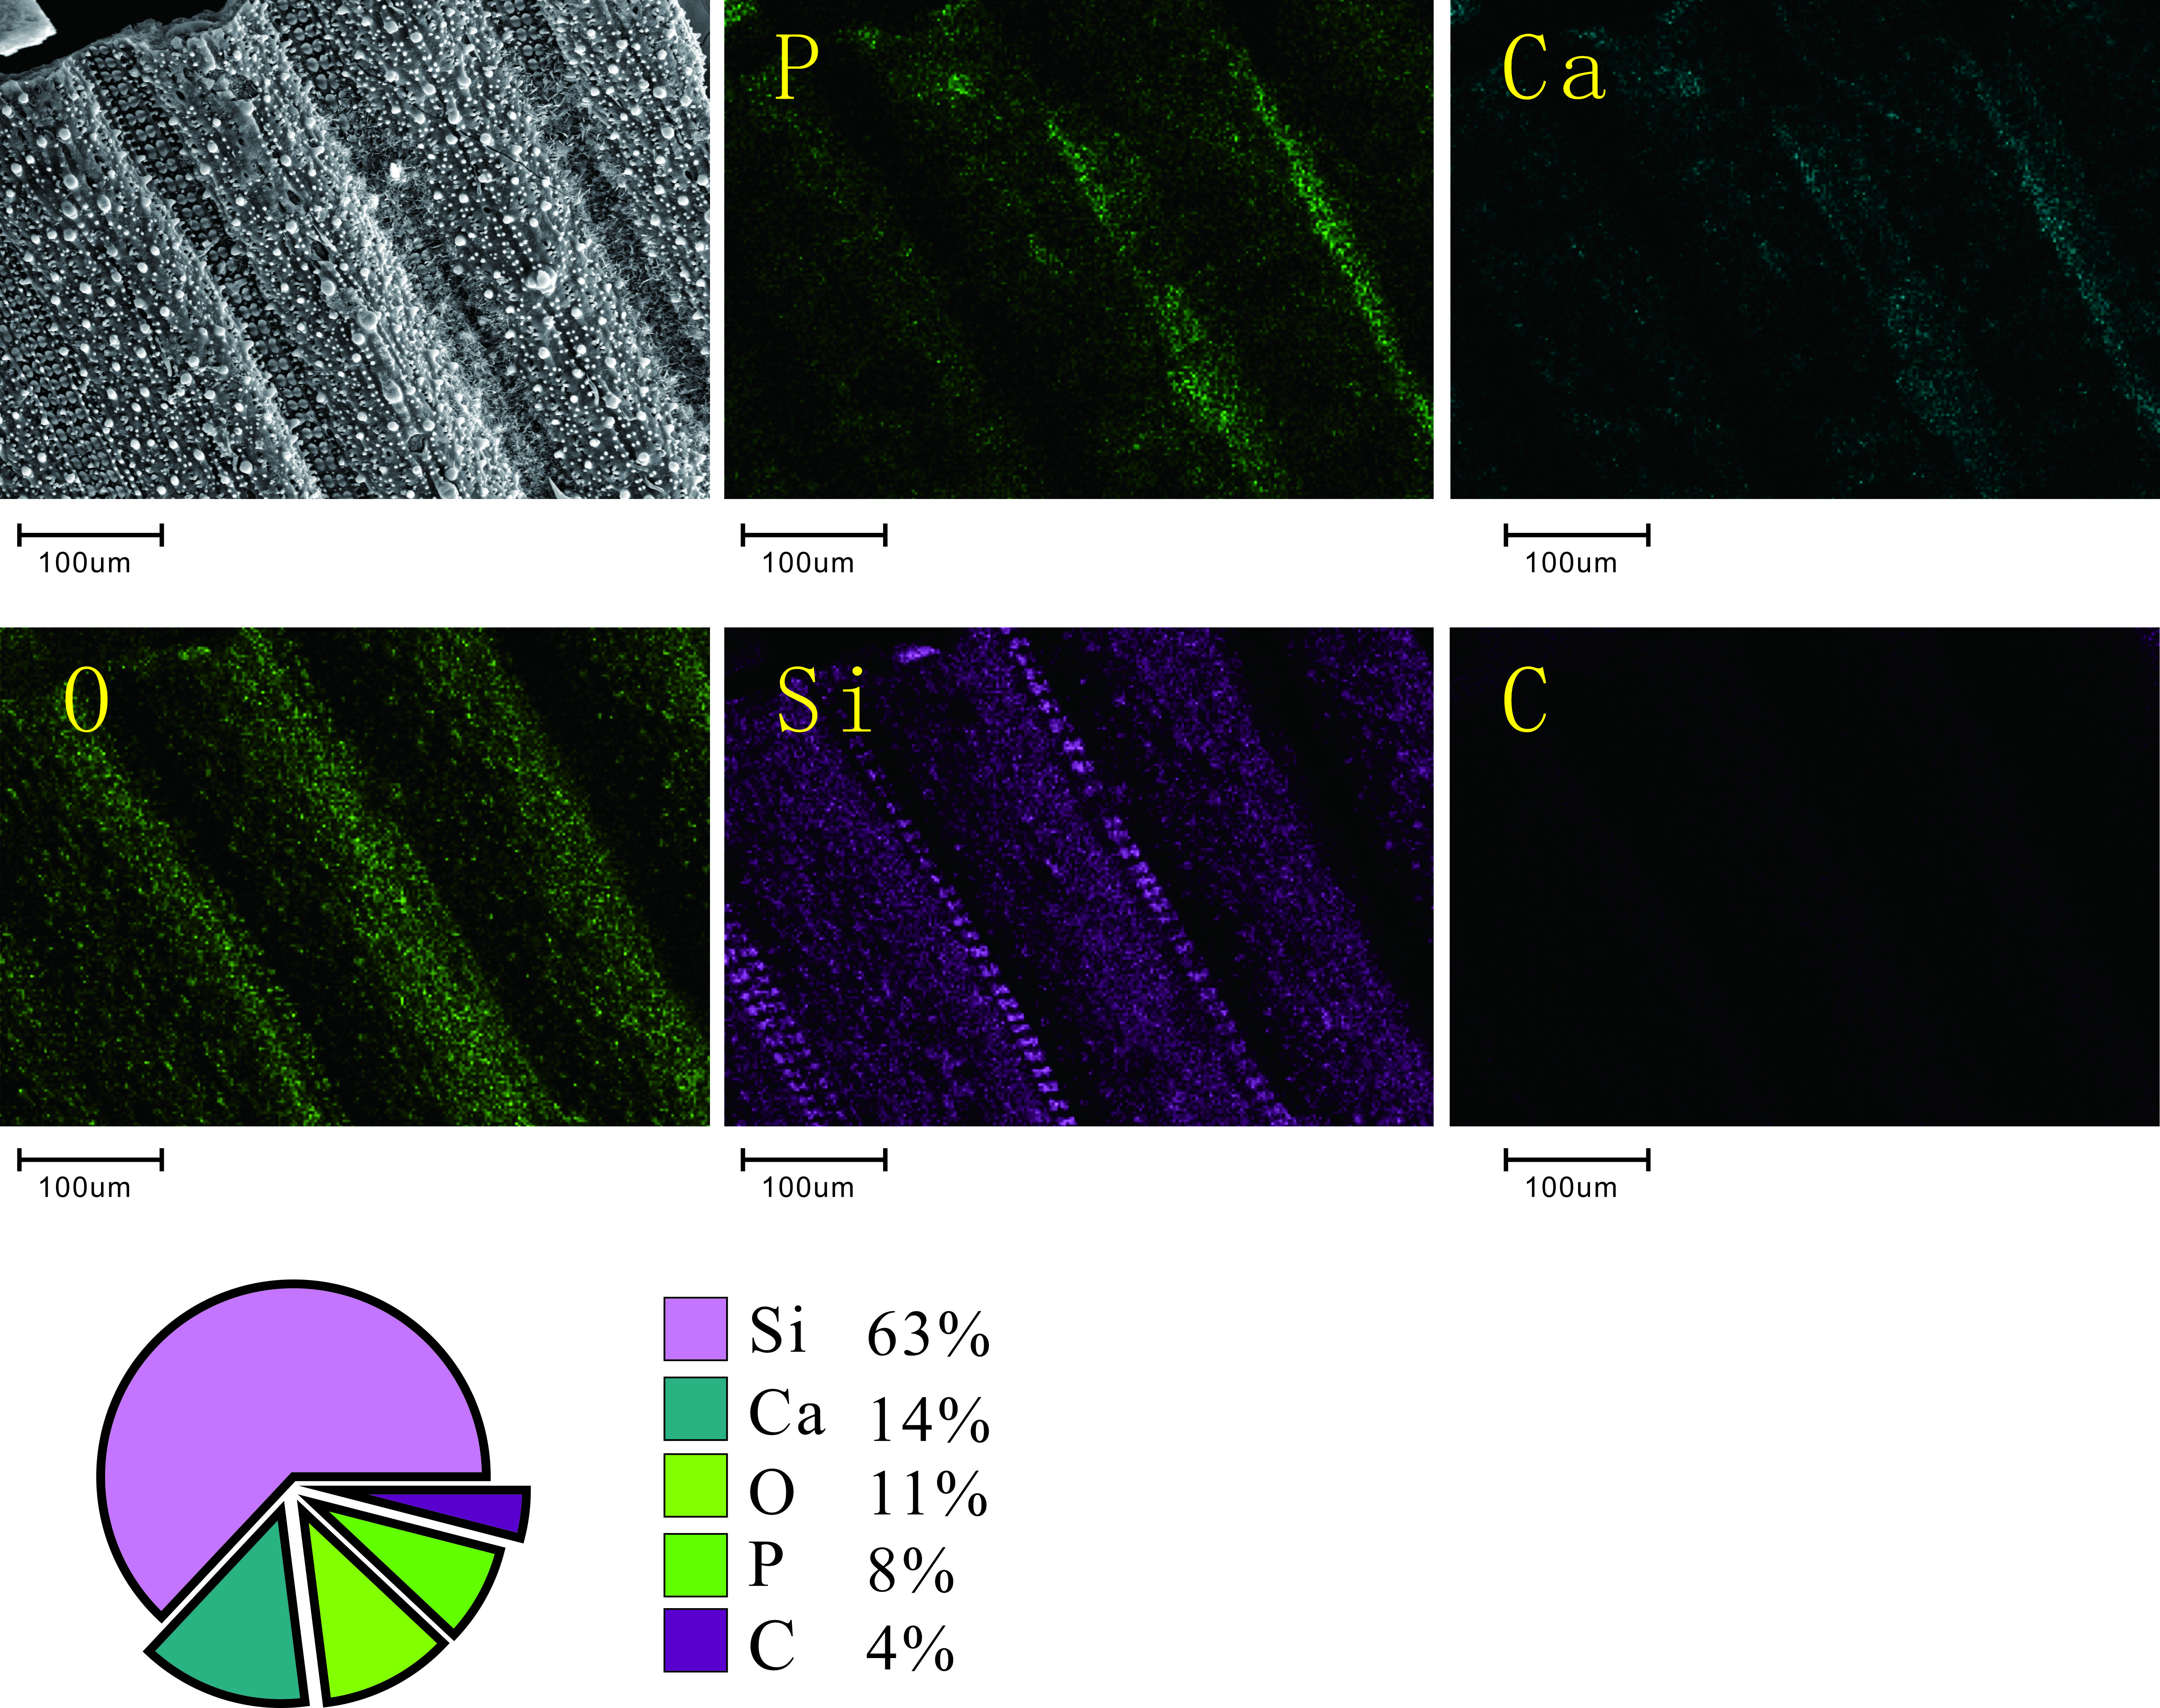


**Fig. S4.** SEM elemental mapping of 700GBC after adsorption.
